# Supplementary material for: Effect of Vegan Fecal Microbiota Transplantation on Carnitine‐ and Choline‐Derived Trimethylamine‐N‐Oxide Production and Vascular Inflammation in Patients With Metabolic Syndrome
Source: PubMed Central journal article supplement — J Am Heart Assoc. 2018 Mar 26;7(7):e008342. doi: 10.1161/JAHA.117.008342 (PMC5907601; doi:10.1161/jaha.117.008342), 2018-03-26

# **SUPPLEMENTAL MATERIAL**

**Table S1. Safety parameters in obese metabolic syndrome subjects before and after FMT.**

|                                       | Autologous<br>FMT t=0 | Autologous<br>FMT t=2w | P-<br>value | Vegan donor<br>FMT t=0 | Vegan<br>donor FMT<br>t=2w | P-<br>value |
|---------------------------------------|-----------------------|------------------------|-------------|------------------------|----------------------------|-------------|
| Hemoglobin<br>(mmol/l)                | 9.6 ± 0.4             | 9.2 ± 0.5              | 0.01        | 9.5 ± 0.6              | 9.6 ± 0.6                  | 0.54        |
| Thrombocytes<br>(*10 <sup>9</sup> /l) | 229.1 ±<br>20.8       | 239.1 ±<br>39.2        | 0.23        | 239.9 ±<br>48.3        | 243.2 ±<br>56.9            | 0.71        |
| Leucocytes (*10 <sup>9</sup> /l)      | 6.3 ± 1.2             | 6.0 ± 0.8              | 0.28        | 5.6 ± 1.2              | 5.6 ± 0.9                  | 0.87        |
| CRP (mg/ml)                           | 1.9<br>[1.2 –<br>4.5] | 3.6<br>[1.2 –<br>5.1]  | 0.59        | 1.5<br>[0.8 – 4.3]     | 2.2<br>[1.0 – 5.8]         | 0.51        |
| Creatinine (umol/l)                   | 80.4 ±<br>13.1        | 81.4 ±<br>14.0         | 0.57        | 85.7 ± 10.7            | 85.0 ± 9.0                 | 0.61        |
| Bilirubin (iU/l)                      | 10.0 ± 4.5            | 10.1 ± 3.3             | 0.87        | 9.3 ± 2.1              | 9.5 ± 3.0                  | 0.74        |
| ALT (iU/l)                            | 37.2 ±<br>12.9        | 29.4 ± 8.4             | 0.01        | 35.1 ± 8.4             | 34.9 ±<br>13.3             | 0.93        |
| AST (iU/l)                            | 30.2 ±<br>11.6        | 24.1 ± 5.2             | 0.14        | 26.7 ± 5.4             | 26.4 ±<br>12.9             | 0.92        |
| AP (iU/l)                             | 74.8 ±<br>18.2        | 71.0 ±<br>16.5         | 0.13        | 71.1 ± 17.1            | 58.9 ±<br>26.7             | 0.19        |
| γGT (iU/l)                            | 44.2 ±<br>26.5        | 33.7 ±<br>13.7         | 0.08        | 49.8 ± 26.0            | 46.9 ±<br>34.9             | 0.62        |
| Glucose (mmol/l)                      | 6.18 ± 0.9            | 6.0 ± 0.6              | 0.61        | 5.8 ± 0.5              | 5.9 ± 0.6                  | 0.62        |
| Insulin (miU/l)                       | 107.7 ±<br>45.5       | 121.0 ±<br>76.5        | 0.38        | 146.0 ±<br>63.7        | 140.7 ±<br>64.8            | 0.78        |
| HbA1C (mmol/mol)                      | 38.7 ± 3.6            | 38.3 ± 3.9             | 0.22        | 36.9 ± 5.1             | 37.4 ± 3.5                 | 0.48        |
| Total cholesterol<br>(mmol/l)         | 5.3 ± 0.8             | 5.0 ± 0.7              | 0.04        | 5.3 ± 0.9              | 5.3 ± 0.9                  | 0.94        |
| LDL-c (mmol/l)                        | 3.1 ± 1.3             | 3.2 ± 0.5              | 0.68        | 3.5 ± 0.7              | 3.5 ± 0.8                  | 0.85        |
| HDL-c (mmol/l)                        | 1.2 ± 0.2             | 1.2 ± 0.2              | 0.78        | 1.1 ± 0.2              | 1.2 ± 0.2                  | 0.47        |
| Triglycerides<br>(mmol/l)             | 1.3<br>[1.1 –<br>1.6] | 1.0<br>[0.7 –<br>1.5]  | 0.005       | 1.3<br>[1.0 – 1.6]     | 1.3<br>[1.0 – 2.2]         | 0.92        |

Data are depicted as means + SDs or medians + IQRs, based on their distribution. A p-value < 0.05

was considered significant. ALT = alanine transaminase; AP = alkaline phosphatase; AST = aspartate transaminase; CRP = c-reactive protein; FMT = fecal microbiota transplantation; γGT = gamma-glutamyltransferase; HbA1c = glycated hemoglobin; HDL-c = high-density lipoprotein cholesterol; IQR = interquartile range; LDL-c = low-density lipoprotein cholesterol; SD = standard deviation

**Table S2. Daily nutritional intake in lean vegan donors and obese metabolic syndrome subjects.**

|                       | Metabolic syndrome patients<br>All (n=19) | Vegan donors<br>(n=8) | P-value |
|-----------------------|-------------------------------------------|-----------------------|---------|
| Calories (kcal/day)   | 2038.7 ± 381.9                            | 2068.3 ± 264.6        | 0.86    |
| Fat (g/day)           | 76.1 ± 16.3                               | 72.8 ± 17.7           | 0.75    |
| Carbohydrates (g/day) | 203.9 ± 70.0                              | 245.0 ± 46.5          | 0.20    |
| Protein (g/day)       | 84.7 ± 16.5                               | 69.2 ± 5.5            | 0.09    |
| Fiber (g/day)         | 18.0 ± 4.2                                | 43.4 ± 19.2           | <0.001  |

Shown is daily dietary intake, divided in 5 food constituents, as calculated from a 7-day dietary record.

Data are depicted as means + SDs. A p-value < 0.05 was considered significant

**Table S3. Daily nutritional intake of obese metabolic syndrome subjects before and after FMT.**

|                          | Autologous<br>FMT t=0 | Autologous<br>FMT t=2w | P-value | Vegan<br>donor<br>FMT t=0 | Vegan<br>donor<br>FMT t=2w | P-value |
|--------------------------|-----------------------|------------------------|---------|---------------------------|----------------------------|---------|
| Calories<br>(kcal/day)   | 1951.6 ±<br>379.8     | 1728.7 ±<br>289.8      | 0.13    | 2010.4 ±<br>343.2         | 2128.6 ±<br>499.1          | 0.33    |
| Fat (g/day)              | 72.7 ±<br>13.7        | 59.2 ± 7.6             | 0.13    | 75.5 ±<br>17.1            | 74.3 ±<br>18.2             | 0.86    |
| Carbohydrates<br>(g/day) | 178.3 ±<br>56.1       | 184.9 ±<br>65.3        | 0.53    | 209.7 ±<br>71.4           | 218.8 ±<br>94.6            | 0.51    |
| Protein (g/day)          | 89.2 ±<br>19.4        | 76.8 ±<br>12.7         | 0.11    | 78.2 ± 9.4                | 82.1 ±<br>13.1             | 0.32    |
| Fiber (g/day)            | 17.4 ±5.9             | 18.1 ± 4.6             | 0.51    | 17.8 ± 3.2                | 17.1 ±<br>4.3              | 0.56    |

Shown is daily dietary intake, divided in 5 food constituents, as calculated from a 7-day dietary record.

Data represent dietary recording of metabolic syndrome subjects, in the autologous and vegan FMT group, both before and after treatment. Data are depicted as means + SDs. A p-value < 0.05 was considered significant. FMT = fecal microbiota transplantation

**Figure S1. D6-choline plasma and urine metabolites.**

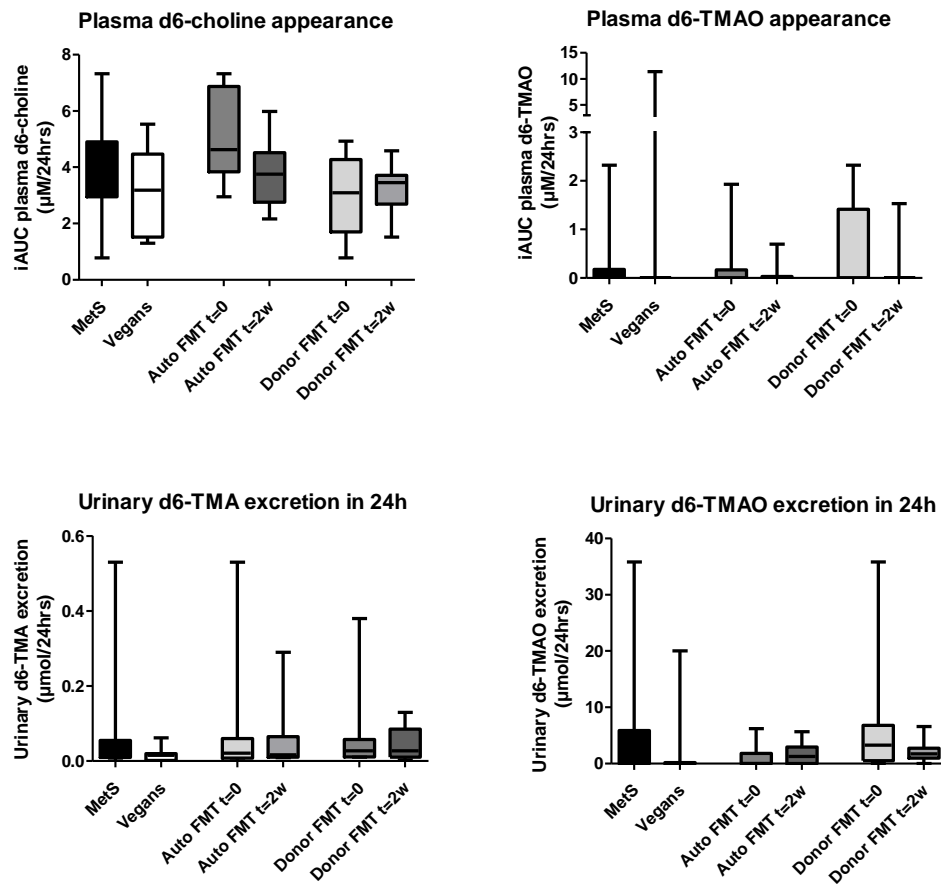

Graphs showing the 24-hour appearance of d6-choline in plasma (A), the 24-hour appearance of d6-TMAO (from d6-choline) in plasma (B) and the total urinary excretion of d6-TMAO and d6-TMA in the 24 hours following oral ingestion of 250mg d6-labeled choline (C-D). Data are depicted as box-and-whisker plots. No significant differences were found. Auto FMT = autologous fecal microbiota transplantation; Donor FMT = lean vegan donor fecal microbiota transplantation; iAUC = incremental area under the curve; MetS = obese omnivorous metabolic syndrome patients; TMA = trimethylamine; TMAO = trimethylamine-N-oxide; Vegans = lean vegan FMT donors

**Figure S2A-D. Monocyte cytokine production after lean vegan donor or autologous FMT.**

Depicted is the ex vivo monocyte production of 4 different cytokines (A: IL1- $\beta$ ; B: IL6; C: IL10; D: TNF- $\alpha$ ), after in total 6 stimuli of which RPMI served as the control stimulus. Data are depicted as box-and-whisker plots. A p-value < 0.05 was considered significant and is marked with an asterisk.

Auto = autologous fecal microbiota transplantation; Allo = lean vegan donor fecal microbiota transplantation; e. coli = Escherichia coli; IL = interleukin; LPS = lipopolysaccharide; oxLDL = oxidized low-density lipoprotein; RPMI = Roswell Park Memorial Institute medium; TNF $\alpha$  = tumor-necrosis factor  $\alpha$

A.

IL1- $\beta$

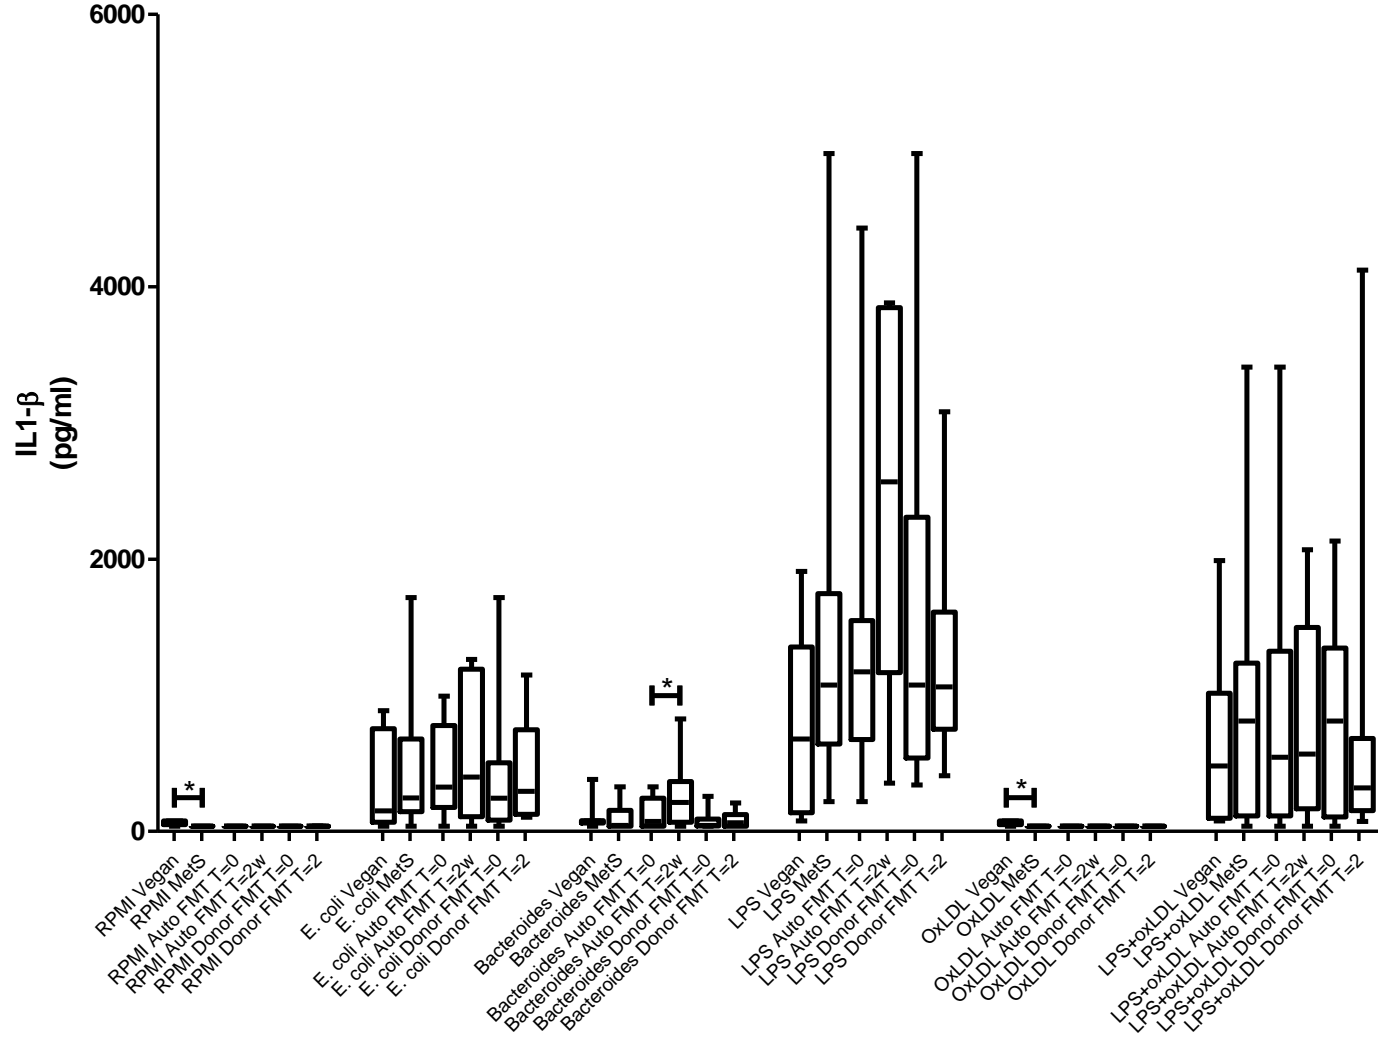

B.

IL6

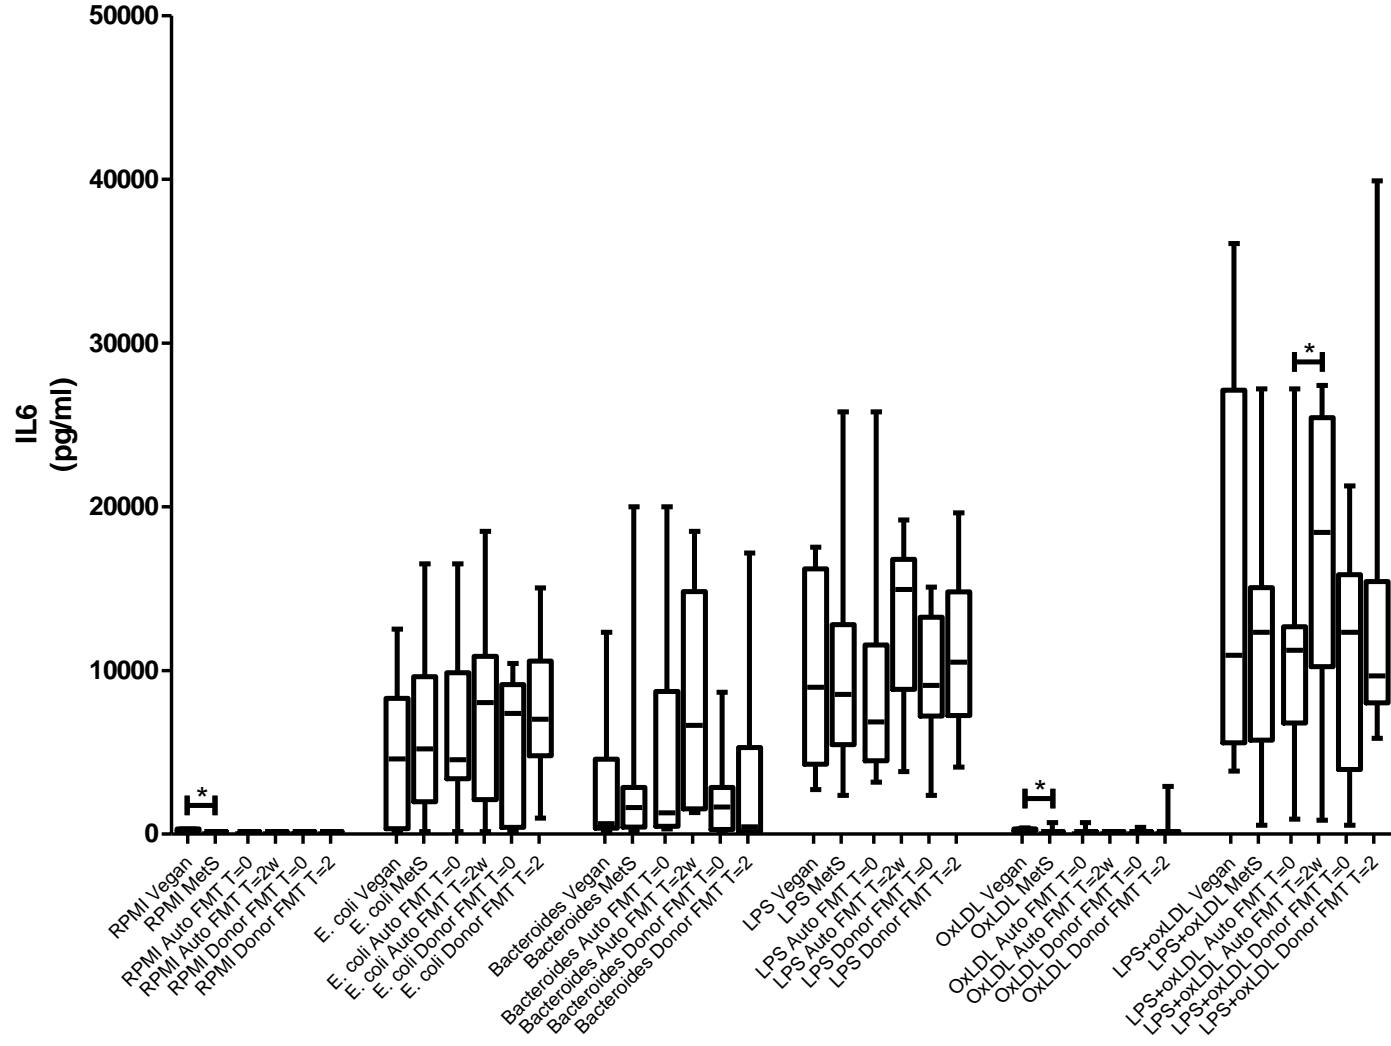



C.

IL10

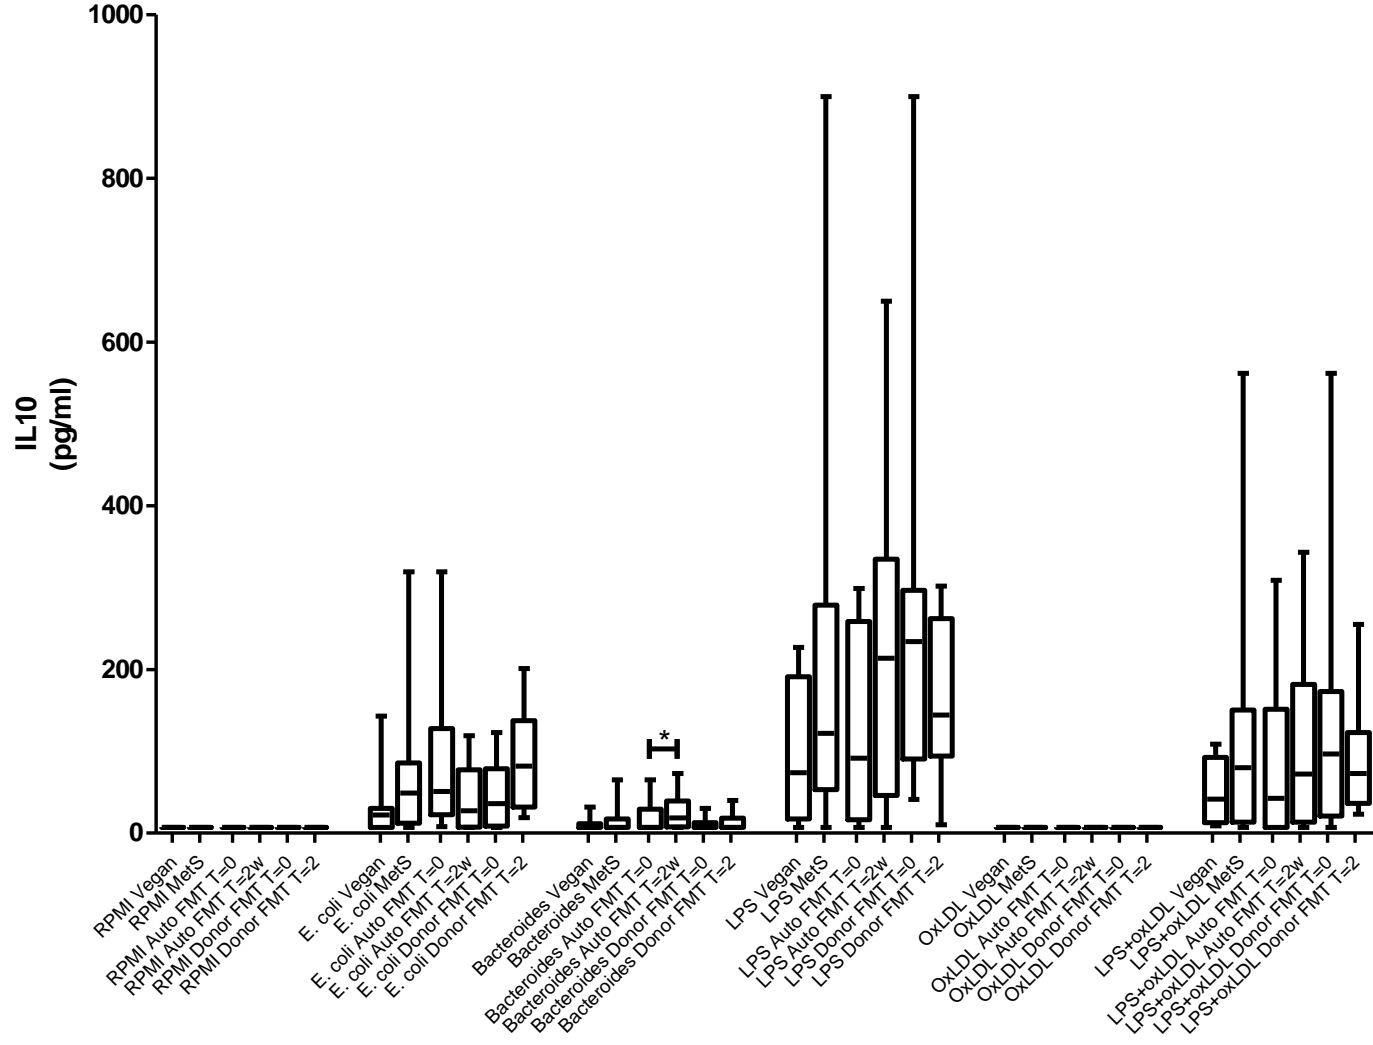

D.

TNF- $\alpha$

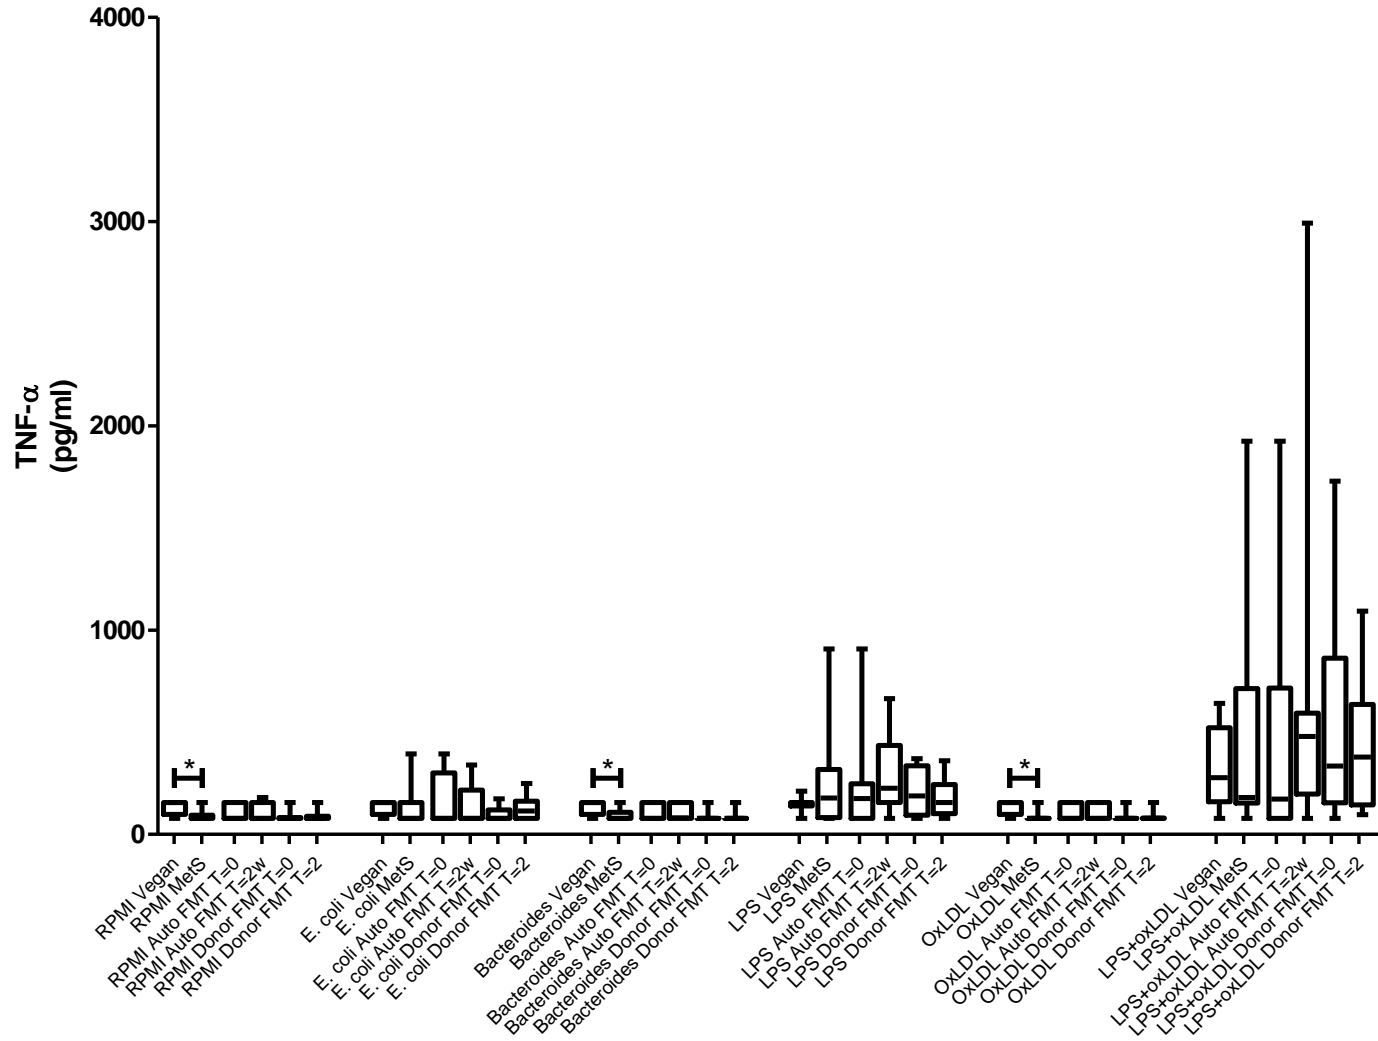

Supplement: JAH3-7-e008342-s001.pdf [file JAH3-7-e008342-s001.pdf]
